# Supplementary material for: Urban Biodiversity, City-Dwellers and Conservation: How Does an Outdoor Activity Day Affect the Human-Nature Relationship?
Source: PLoS One. 2012 Jun 8;7(6):e38642. doi: 10.1371/journal.pone.0038642 (PMC3371046; doi:10.1371/journal.pone.0038642)
Supplement: Table S1 — Description of the social and pro-environmental profiles of the participants interviewed a few months after the activity days. (XLSX) [file pone.0038642.s004.xlsx]

## Sheet: Feuil1
Interviewee	Garden	Activities	Live locally	Gender	Age	Marital status	Children	Job (in relation with environment)	NGO (biodiversity, nature)	Newspapers' subscription(biodiversity, nature)
1	Colbert	1,2,6	Yes	M	40'	Couple	No	No	No	No
2	Colbert	1,3, 6	Yes	M	70'	Couple	Yes	No	Yes	No
3	Colbert	1, 2, 4, 5	Yes	F	30'	Single	No	No	No	No
4	Bartet	1, 3, 6	Yes	F	50'	Single	Yes	No	No	No
5	Colbert	1, 2, 4, 5	Yes	F	70'	Single	No	Yes	Yes	Yes
6	Violet	1, 2, 4, 6	Yes	M	40'	Couple	No	No	No	No
7	Colbert	1, 3, 4, 5, 6	Yes	F	70'	Single	No	No	No	No
8	Colbert	1, 3, 5, 6	Yes	F	70'	Couple	Yes	No	No	Yes
9	Colbert	1, 2, 4, 6	Yes	M	60'	Couple	Yes	No	No	Yes
10	Bartet	2, 4, 5, 6	Yes	M	40'	Single	No	No	No	No
11	Colbert	1, 2, 3, 4, 6	Yes	F	60'	Single	Yes	No	Yes	Yes
12	Violet		Yes	F		Single	No	No	No	No
13	Violet	5	Yes	F	60'	Couple	Yes	No	No	No
